# Supplementary material for: Early Detection of Preeclampsia Using Circulating Small non-coding RNA
Source: PubMed Central journal article supplement (PMC5821867; doi:10.1038/s41598-018-21604-6), 2018-02-21
Supplement: 41598_2018_21604_MOESM1_ESM.pdf [file 41598_2018_21604_MOESM1_ESM.pdf]

# Early Detection of Preeclampsia Using Circulating Small non-coding RNA

Liron Yoffe<sup>1</sup>, Avital Gilam<sup>1</sup>, Orly Yaron<sup>1</sup>, Avital Polsky<sup>1</sup>, Luba Farberov<sup>1</sup>, Argyro Syngelaki<sup>2</sup>,  
Kypros Nicolaides<sup>2</sup>, Moshe Hod<sup>1,3</sup> and Noam Shomron<sup>1\*</sup>

<sup>1</sup> Faculty of Medicine, Tel Aviv University, Tel Aviv, Israel

<sup>2</sup> Harris Birthright Research Centre for Fetal Medicine, King's College, London, UK.

<sup>3</sup> Rabin Medical Center, Petah-Tikva, Israel

\* Corresponding author: [nshomron@post.tau.ac.il](mailto:nshomron@post.tau.ac.il), 972-3-6406594

Supplementary Table S1

| miRNA                | Fold Change<br>(small RNA-Seq) | <i>p</i> -value | Correlation<br>between<br>sequencing<br>and qPCR ( $r^2$ ) | <i>p</i> -value |
|----------------------|--------------------------------|-----------------|------------------------------------------------------------|-----------------|
| <b>microRNA 99b</b>  | 0.65                           | 1.57E-04        | 0.83                                                       | 0.017           |
| <b>microRNA 151a</b> | 0.75                           | 5.68E-04        | 0.73                                                       | 0.011           |
| <b>microRNA 191</b>  | 0.75                           | 6.26E-04        | 0.7                                                        | 0.016           |
| <b>microRNA 146b</b> | 0.75                           | 2.67E-03        | 0.85                                                       | 0.00099         |
| <b>microRNA 221</b>  | 1.44                           | 3.97E-03        | 0.83                                                       | 0.0015          |

Table 1 Correlation values between five differentially expressed miRNAs in PE vs. control samples and RT-qPCR experiments. Pearson's product moment correlation coefficient were calculated between normalized counts obtained by sequencing and qPCR normalized values ( $2^{-Ct}$ ).

Supplementary Table S2

| Transcript ID          | Transcript Description                | Transcript Biotype   | Base Mean | Fold Change | P-Value  | Adjusted P-Value |
|------------------------|---------------------------------------|----------------------|-----------|-------------|----------|------------------|
| <b>ENST00000514519</b> | RP11-259O2.3-001                      | lincRNA              | 134.59    | 3.83        | 4.47E-05 | 0.0011           |
| <b>ENST00000361558</b> | mucin 2, oligomeric mucus/gel-forming | processed_transcript | 629.80    | 2.15        | 0.0005   | 0.0057           |
| <b>ENST00000387461</b> | mitochondrially encoded tRNA proline  | Mt_tRNA              | 307.32    | 2.43        | 0.0011   | 0.0069           |
| <b>ENST00000385011</b> | microRNA 10b                          | miRNA                | 2,008.14  | 0.42        | 0.0011   | 0.0069           |
| <b>ENST00000614316</b> | AC020956.3-001                        | lincRNA              | 481.48    | 1.97        | 0.0020   | 0.01             |
| <b>ENST00000385255</b> | microRNA 182                          | miRNA                | 631.14    | 0.40        | 0.0026   | 0.01             |
| <b>ENST00000612171</b> | AC113133.1-201                        | miRNA                | 10,042.65 | 0.43        | 0.0045   | 0.02             |
| <b>ENST00000365699</b> | microRNA 146b                         | miRNA                | 445.87    | 0.48        | 0.0049   | 0.02             |
| <b>ENST00000387347</b> | mitochondrially encoded 16S RNA       | Mt_rRNA              | 4,147.66  | 0.48        | 0.02     | 0.04             |

**Table 2 Significantly differentially expressed transcripts in PE vs. control samples in the limited data set of 40 first trimester samples, that were also differentially expressed in the analysis of the entire dataset.**

Supplementary Table S3

| Transcript ID          | Transcript Description              | Transcript Biotype | Base Mean | Fold Change | P-Value  | Adjusted P-Value |
|------------------------|-------------------------------------|--------------------|-----------|-------------|----------|------------------|
| <b>ENST00000385135</b> | microRNA 221                        | miRNA              | 371.00    | 5.40        | 1.09E-05 | 0.0003           |
| <b>ENST00000514519</b> | RP11-259O2.3-001                    | lincRNA            | 309.82    | 5.08        | 2.77E-05 | 0.0003           |
| <b>ENST00000387342</b> | mitochondrially encoded tRNA valine | Mt_tRNA            | 2,947.79  | 0.24        | 0.0014   | 0.0113           |
| <b>ENST00000387421</b> | mitochondrially encoded tRNA lysine | Mt_tRNA            | 1,729.23  | 0.26        | 0.0022   | 0.0136           |

**Table 3 Significantly differentially expressed transcripts in PE vs. control samples in the limited data set of 40 second trimester samples, that were also differentially expressed in the analysis of the entire dataset of first trimester samples.**

Supplementary Table S4

| Transcript ID   | Transcript Description                        | Transcript Biotype   | Base Mean | Fold Change | P-Value | Adjusted P-Value |
|-----------------|-----------------------------------------------|----------------------|-----------|-------------|---------|------------------|
| ENST00000521276 | microRNA 151a                                 | miRNA                | 4,514.08  | 0.27        | 0.04    | 0.40             |
| ENST00000384873 | microRNA 191                                  | miRNA                | 12,546.19 | 0.28        | 0.06    | 0.40             |
| ENST00000384819 | microRNA 99b                                  | miRNA                | 129.85    | 0.31        | 0.07    | 0.40             |
| ENST00000362280 | microRNA let-7g                               | miRNA                | 653.84    | 0.36        | 0.08    | 0.40             |
| ENST00000387342 | mitochondrially encoded tRNA valine           | Mt_tRNA              | 1,517.16  | 0.31        | 0.09    | 0.40             |
| ENST00000385135 | microRNA 221                                  | miRNA                | 446.48    | 0.36        | 0.10    | 0.40             |
| ENST00000626826 | HELLP associated long non-coding RNA          | macro_lincRNA        | 497.67    | 1.30        | 0.14    | 0.49             |
| ENST00000365699 | microRNA 146b                                 | miRNA                | 413.93    | 0.42        | 0.17    | 0.52             |
| ENST00000385300 | microRNA 143                                  | miRNA                | 861.77    | 0.45        | 0.19    | 0.52             |
| ENST00000385255 | microRNA 182                                  | miRNA                | 617.00    | 0.47        | 0.23    | 0.52             |
| ENST00000612171 | AC113133.1-201                                | miRNA                | 10,420.59 | 0.48        | 0.24    | 0.52             |
| ENST00000387461 | mitochondrially encoded tRNA proline          | Mt_tRNA              | 315.89    | 1.74        | 0.25    | 0.52             |
| ENST00000385011 | microRNA 10b                                  | miRNA                | 2,488.02  | 0.53        | 0.27    | 0.53             |
| ENST00000514519 | RP11-259O2.3-001                              | lincRNA              | 209.70    | 0.60        | 0.39    | 0.63             |
| ENST00000384816 | microRNA 25                                   | miRNA                | 2,728.09  | 0.59        | 0.40    | 0.63             |
| ENST00000387441 | mitochondrially encoded tRNA histidine        | Mt_tRNA              | 356.59    | 1.70        | 0.40    | 0.63             |
| ENST00000387449 | mitochondrially encoded tRNA serine 2 (AGU/C) | Mt_tRNA              | 1,106.02  | 1.44        | 0.52    | 0.74             |
| ENST00000614316 | AC020956.3-001                                | lincRNA              | 568.39    | 0.80        | 0.54    | 0.74             |
| ENST00000315707 | long intergenic non-protein coding RNA 324    | lincRNA              | 651.28    | 0.83        | 0.57    | 0.74             |
| ENST00000387421 | mitochondrially encoded tRNA lysine           | Mt_tRNA              | 926.67    | 0.71        | 0.60    | 0.74             |
| ENST00000387409 | mitochondrially encoded tRNA tyrosine         | Mt_tRNA              | 207.66    | 1.27        | 0.64    | 0.74             |
| ENST00000387347 | mitochondrially encoded 16S RNA               | Mt_rRNA              | 6,306.61  | 1.28        | 0.68    | 0.74             |
| ENST00000365096 | RNA, 5.8S ribosomal pseudogene 4              | rRNA                 | 1,782.07  | 0.81        | 0.69    | 0.74             |
| ENST00000581329 | microRNA 4433b                                | miRNA                | 200.30    | 0.79        | 0.72    | 0.75             |
| ENST00000361558 | mucin 2, oligomeric mucus/gel-forming         | processed_transcript | 792.728   | 0.94        | 0.87    | 0.87             |

Table 4 Differentially expressed transcripts in PE vs. control samples obtained by analysis of the entire first trimester data set and their fold changes difference between the first and second trimester. Fold changes are a ratio of first trimester fold change divided by second trimester fold change.
